# Supplementary material for: Portable Alkaline Phosphatase–Hydrogel Platform: From Enzyme Characterization to Phosphate Sensing
Source: MDPI journal article supplement (doi:10.3390/ijms24032672), 2023-01-31
Supplement: s1 [file s1]

# SUPPLEMENTARY MATERIAL

## Portable alkaline phosphatase-hydrogel platform: from enzyme characterization to phosphate sensing

Yolanda Alacid <sup>1</sup>, María José Martínez-Tomé <sup>1</sup>, Rocio Esquembre <sup>1</sup>, Maria Antonia Herrero <sup>2</sup>  
and C. Reyes Mateo <sup>1,\*</sup>

<sup>1</sup> Instituto de Investigación Desarrollo e Innovación en Biotecnología Sanitaria de Elche (IDiBE),  
Universidad Miguel Hernández de Elche (UMH), 03202 Elche, Alicante, Spain.

<sup>2</sup> Instituto Regional de Investigación Científica Aplicada (IRICA), 13071 Ciudad Real, Spain.

\* Correspondence: [rmateo@umh.es](mailto:rmateo@umh.es)

**KEYWORDS:** Hydrogel; alkaline phosphatase; immobilization, biosensor, portable device,  
protein thermal stability

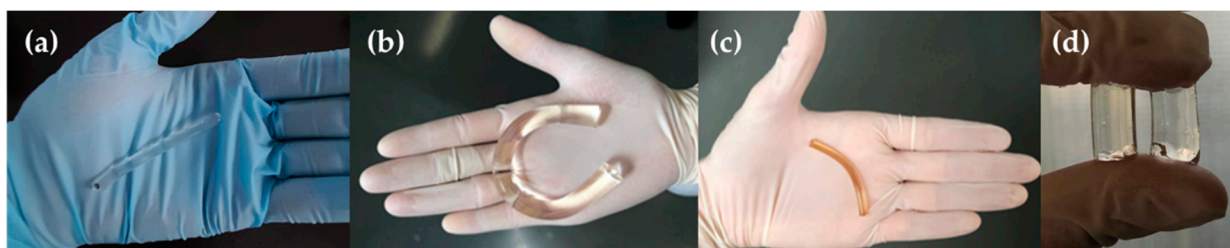

**Figure S1.** Digital image of (a) freshly prepared, (b) swollen, (c) oven-dried AETA hydrogel and (d) cylindrical-shaped swollen *in situ* (left) and *ex situ* (right) ALP@AETA hydrogels (0.75 cm diameter, 1.5 cm of size and 0.9 mL of solution inside).

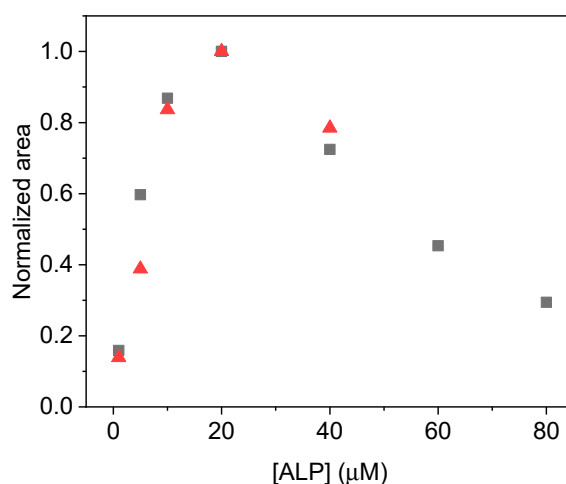

**Figure S2.** Area under the normalized curve of fluorescence emission spectra ( $\lambda_x = 290$  nm;  $\lambda_{em} = 300-400$  nm) of increasing concentrations of ALP in solution (black dots) and immobilized in the hydrogel (red triangle).

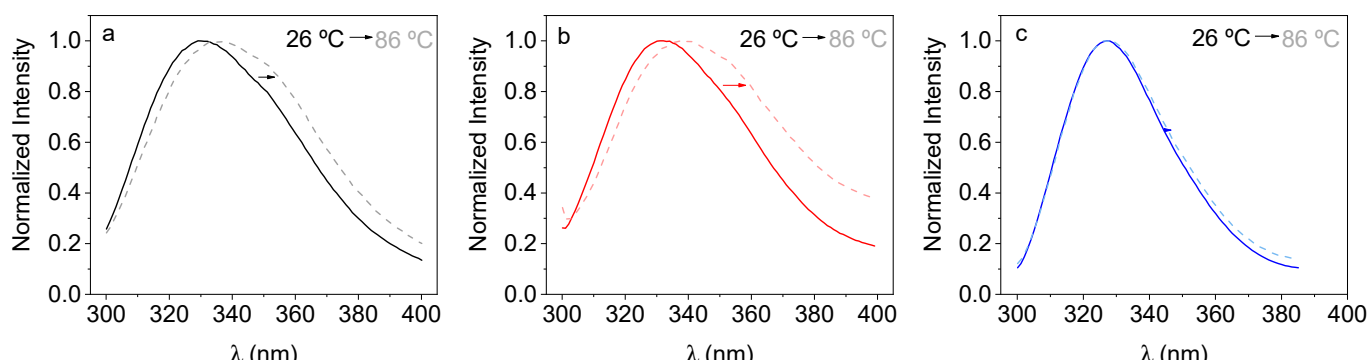

**Figure S3.** Normalized fluorescence emission spectra of ALP in buffered solution (a), *ex situ* (b) and *in situ* (c) immobilization in hydrogel at 26 °C (solid lines) and 86 °C (dashed lines).

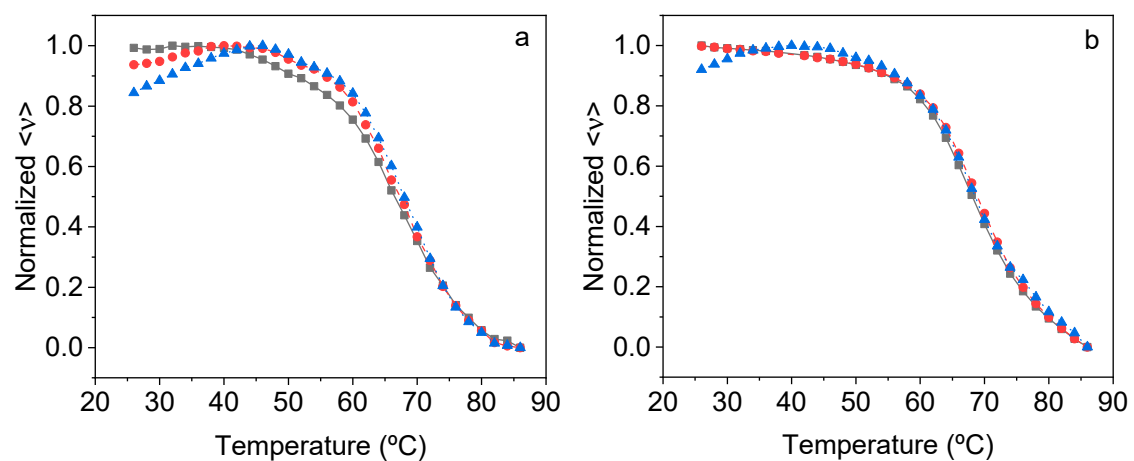

**Figure S4.** Evolution of the mean fluorescence energy  $\langle v \rangle$  of ALP in solution **(a)** and *ex situ* ALP@AETA **(b)** samples after 1 (■), 21 (●), 30 (▲) days stored at 4°C.
